# Supplementary material for: A Highly Active Chimeric Lysin with a Calcium-Enhanced Bactericidal Activity against Staphylococcus aureus In Vitro and In Vivo
Source: MDPI journal article supplement (doi:10.3390/antibiotics10040461), 2021-04-19
Supplement: s1 [file s1]

## Supplementary Information

# A highly active chimeric lysin with a calcium-enhanced bactericidal activity against *Staphylococcus aureus* in vitro and in vivo

Xiaohong Li <sup>1,2§</sup>, Shujuan Wang <sup>1,2§</sup>, Raphael Nyaruaba <sup>1,2</sup>, Huan Liu <sup>1,2</sup>, Hang Yang <sup>1,2\*</sup>, and Hongping Wei <sup>1,2\*</sup>

**Table S1.** Bacterial strains used in this study.

| Strain                              | Description                                                                                                                                                                                                 |
|-------------------------------------|-------------------------------------------------------------------------------------------------------------------------------------------------------------------------------------------------------------|
| BL21(DE3)                           | F <sup>-</sup> <i>ompT hsdS<sub>B</sub> (r<sub>B</sub><sup>-</sup> m<sub>B</sub><sup>-</sup>) gal dcm</i> λDE3 (harboring gene 1 of the RNA polymerase from the phage T7 under the <i>PlacUV5</i> promoter) |
| <i>E. coli</i> BL21/pET28a-ClyC     | Constructed in this study                                                                                                                                                                                   |
| <i>E. coli</i> BL21/pET28a-Ply187CD | pET28a derivative carrying the catalytic domain of Ply187 gene                                                                                                                                              |
| <i>E. coli</i> BL21/pET28a-SA97CBD  | pET28a derivative containing the cell-wall binding domain of LysSA97 gene                                                                                                                                   |

**Table S2:** Primers used in the overlap PCR.

| Code | Name       | Sequence                                     |
|------|------------|----------------------------------------------|
| A    | Ply187CD-F | ATATCCATGGGCATGGCACTGCCTAAAACGGG             |
| B    | Ply187CD-R | AGTTCCAGGTGATCTTGTCCGCTGGTGGTG-TAGGTTTCGGTTC |
| C    | SA97CBD-F  | GAACCGAAACCTACACCACCAGCGGACAAGATACCTG-GAACT  |
| D    | SA97CBD-R  | TATACTCGAGCGCCCATTCGATGGTGCCCCAG             |

**Table S3.** MIC of ClyC against different *S. aureus* strains.

| <i>S. aureus</i> strains | Drug resistance       | MIC of ClyC (μg/mL) |
|--------------------------|-----------------------|---------------------|
| WHS11016                 | Methicillin-resistant | 18                  |
| WHS11095                 | Methicillin-resistant | 18                  |
| WHS11048                 | Methicillin-resistant | 18                  |
| WHS11101                 | Methicillin-resistant | 18                  |
| WHS11044                 | Methicillin-resistant | 18                  |
| WHS11051                 | Methicillin-resistant | 18                  |
| WHS11036                 | Methicillin-resistant | 9                   |
| WHS11098                 | Methicillin-resistant | 18                  |
| WHS11034                 | Methicillin-resistant | 18                  |
| WHS11009                 | Methicillin-resistant | 9                   |
| WHS11040                 | Methicillin-resistant | 9                   |
| AB91118                  | Methicillin-sensitive | 9                   |

|           |                        |     |
|-----------|------------------------|-----|
| N315      | Methicillin-resistant  | 18  |
| WHS11024  | Methicillin- sensitive | 4.5 |
| WHS11041  | Methicillin-resistant  | 18  |
| WHS11011  | Methicillin-resistant  | 9   |
| WHS11018  | Methicillin-resistant  | 18  |
| WHS11032  | Methicillin-resistant  | 18  |
| WHS11005  | Methicillin-resistant  | 18  |
| WHS11099  | Methicillin-resistant  | 9   |
| WHS11046  | Methicillin-resistant  | 36  |
| WHS11100  | Methicillin-resistant  | 18  |
| WHS11026  | Methicillin-resistant  | 18  |
| WHS11037  | Methicillin-resistant  | 9   |
| WHS11033  | Methicillin-resistant  | 18  |
| WHS11025  | Methicillin-resistant  | 18  |
| ATCC29213 | Methicillin- sensitive | 18  |
| WHS11102  | Methicillin-resistant  | 36  |
| WHS11017  | Methicillin-resistant  | 18  |

Figure S1. Lytic spectrum of ClyC.

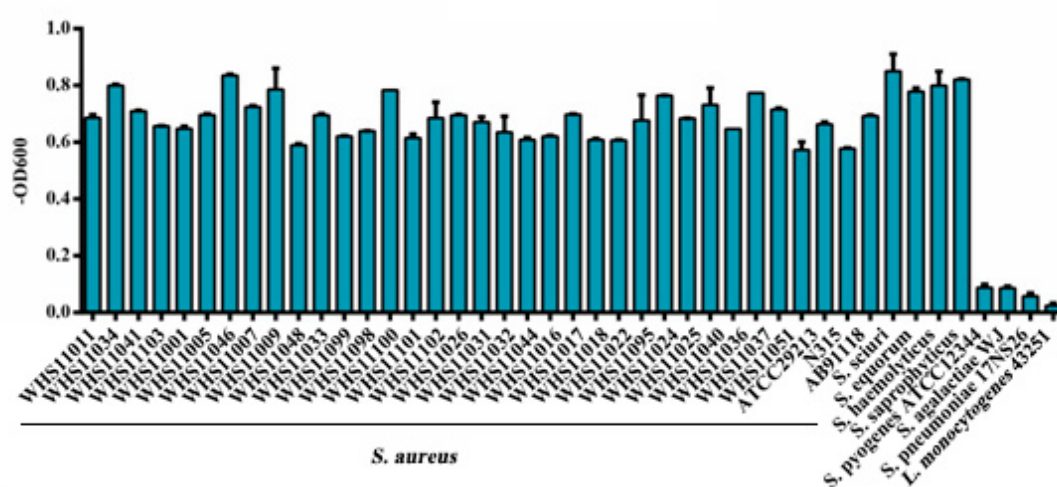

**Fig S1.** Susceptibility of ClyC to staphylococcus and single strains of *S. pyogenes*, *S. agalactiae*, *S. pneumoniae*, and *Listeria monocytogenes*. Strains were washed once with PBS and resuspended to a final OD<sub>600</sub> of 0.8~0.9. After treatment with 25 µg/mL of ClyC at 37 °C for 10 min, the final OD<sub>600</sub> value of treated wells were subtracted from the PBS-treated well to yield the net change in OD<sub>600</sub>, and the bactericidal efficiency determined by the value change of OD<sub>600</sub>. The experiment was repeated three times. Error bars represent the standard deviations.

**Figure S2.** Cytotoxicity of ClyC.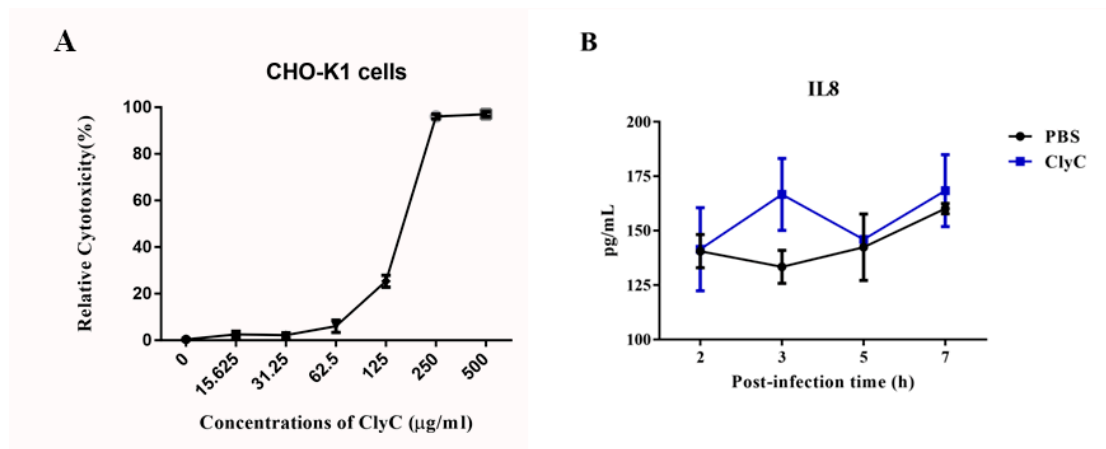

**Fig S2.** Cytotoxicity of ClyC. (A) Cytotoxicity of ClyC to CHO-K1 cells. Cells were co-cultured with different concentrations of ClyC (0, 15.625, 31.25, 62.5, 125, 250, and 500  $\mu\text{g/mL}$ ) for 24 h and the relative viability was calculated by the change of OD<sub>570</sub> by MTT assay. (B) Concentration of IL-8 in mice serum at different times post ClyC treatment.
